# Supplementary material
Source: publisher figshare collection journal article supplement (https://sage.figshare.com/ndownloader/files/21943758)
Supplement: Supplementary file 1 [file 21943758]

**Supplemental Material 1.** Definitions of Location Selection Factors for the Planning and Design of ADCCs

| Dimensions                                                                                | Sub-dimensions<br>(Factors) | Definitions <sup>a</sup>                                                                                                                                                                                                                                      |
|-------------------------------------------------------------------------------------------|-----------------------------|---------------------------------------------------------------------------------------------------------------------------------------------------------------------------------------------------------------------------------------------------------------|
| Natural<br><br>environment and<br><br>human-made<br><br>changes to the<br><br>environment | Physical geography          | Local landform and hydrology characteristics, including mountains, hills, plains, lakes, and rivers.                                                                                                                                                          |
|                                                                                           | Population                  | Local demographic changes and population density, such as population aging; changes in the population or the composition of a region caused by migration; and the number of people per unit area of land, namely the characteristics of high- or low-density. |
|                                                                                           | Climate                     | Characteristics and events of local meteorology, such as temperature, humidity, precipitation, wind, and seasonal changes.                                                                                                                                    |
|                                                                                           | Air quality                 | Characteristics of local air, such as odor and smoke.                                                                                                                                                                                                         |
| Support and<br><br>attitudes                                                              | Local residents             | Whether local residents are friendly to older adults, which refers to their attitudes toward and willingness to cooperate with the development of older adults' welfare.                                                                                      |
|                                                                                           | Authorities                 | Whether the local governments identify the location for the                                                                                                                                                                                                   |

| Dimensions                      | Sub-dimensions<br>(Factors) | Definitions <sup>a</sup>                                                                                                                                                                                                                                                                                                                                                                                                        |
|---------------------------------|-----------------------------|---------------------------------------------------------------------------------------------------------------------------------------------------------------------------------------------------------------------------------------------------------------------------------------------------------------------------------------------------------------------------------------------------------------------------------|
|                                 |                             | development of adult welfare institutions and provide relevant support.                                                                                                                                                                                                                                                                                                                                                         |
| Services, systems, and policies | Health                      | Provision of rehabilitation or health promotion services for the prevention and treatment of health problems, including adjacency to hospitals or clinics with the provision of general medical services, medical institutions in the vicinity that are adequately professional to manage emergency medical events, proximity of medical facilities (e.g., clinics and hospitals), and the accessibility of medical treatments. |
|                                 | Transportation              | Services and planning of public or private transportation by road and rail, such as the proximity of a metro station, bus stop, or dedicated bus service, and the convenience of private parking in the vicinity.                                                                                                                                                                                                               |
|                                 | Public safety               | Provision of services, systems, and policies to protect the lives and                                                                                                                                                                                                                                                                                                                                                           |

| Dimensions | Sub-dimensions<br>(Factors) | Definitions <sup>a</sup>                                                                                                                                |
|------------|-----------------------------|---------------------------------------------------------------------------------------------------------------------------------------------------------|
|            |                             | property of people, such as firefighting and police services.                                                                                           |
|            | Economy                     | Services, systems, and policies related to commodity consumption<br>and use systems, including price level, consumption level, land<br>price, and rent. |

<sup>a</sup>Based on the definitions for International Classification of Functioning, Disability and Health (ICF).

(World Health Organization, 2001)
